# Supplementary material for: Arachidonic acid-induced Ca2+ entry and migration in a neuroendocrine cancer cell line
Source: PubMed Central journal article supplement (PMC5834873; doi:10.1186/s12935-018-0529-8), 2018-03-02
Supplement: 12935_2018_529_MOESM3_ESM.pdf [file 12935_2018_529_MOESM3_ESM.pdf]

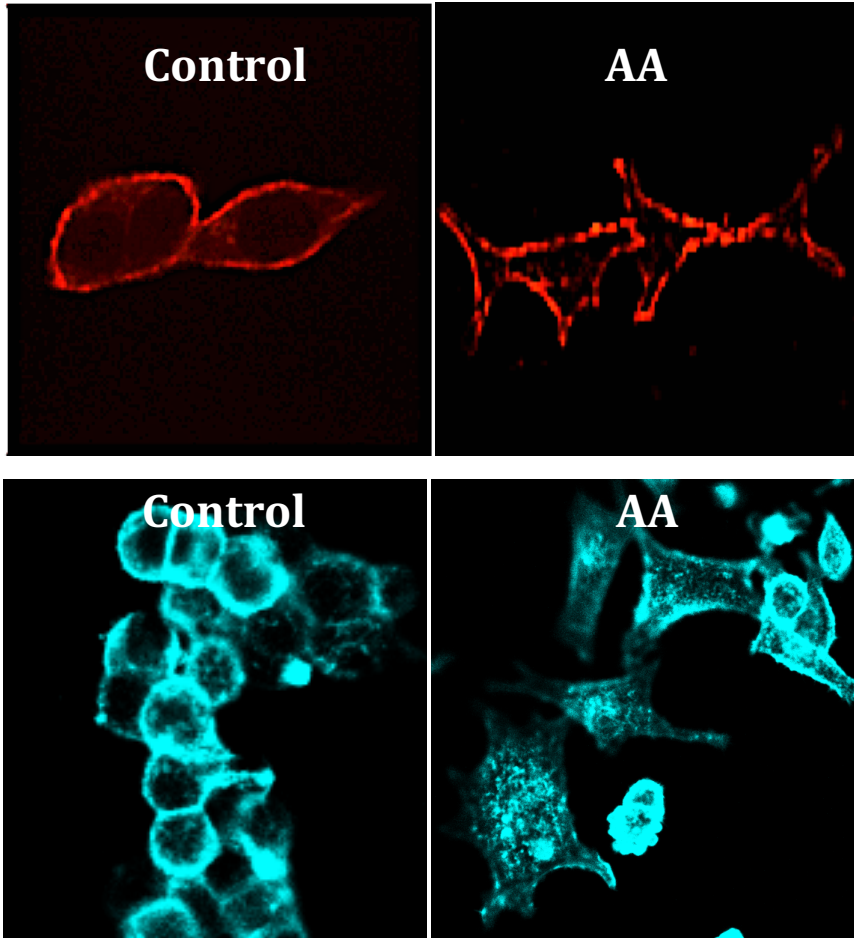

Supplementary Figure 3
