# Supplementary material for: Arachidonic acid-induced Ca2+ entry and migration in a neuroendocrine cancer cell line
Source: Springer Nature journal article supplement (doi:10.1186/s12935-018-0529-8), 2018-03-02
Supplement: MOESM2 [file 15504016]

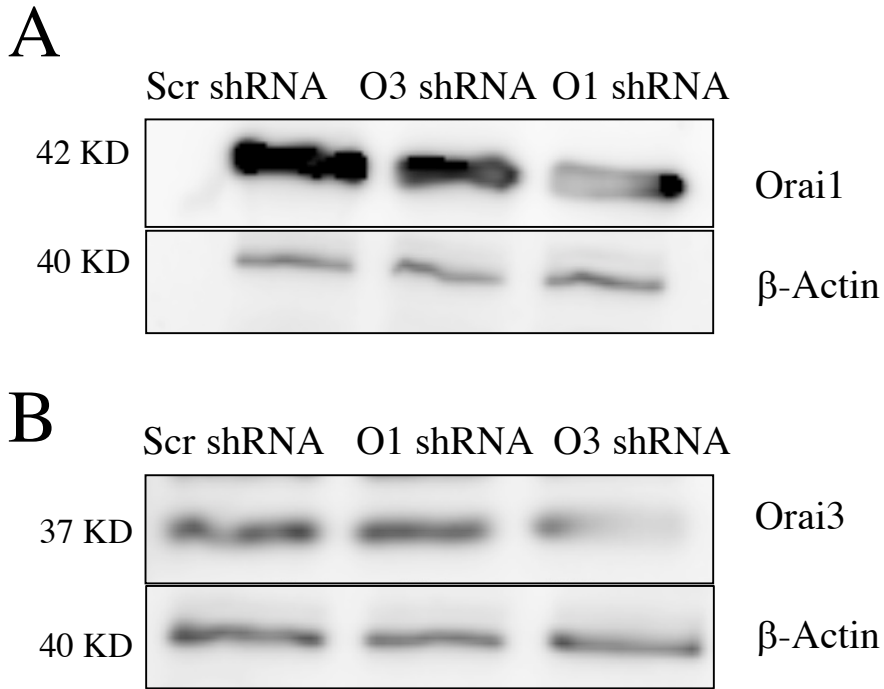

Supplementary Figure 2
